# Supplementary material for: One-step immunoassay for the detection of food-poisoning related bacteria using a switching peptide
Source: Royal Society of Chemistry journal article supplement (doi:10.1039/d2an00940d), 2022-01-01

## Supplementary Information

### One-step immunoassay for microbial detection using isolated antibodies from un-immunized horse serum

Chang Kyu Lee<sup>a,#</sup>, Jaeyong Jung<sup>a,#</sup>, Hong-Rae Kim<sup>a</sup>, Ji-Hong Bong<sup>a</sup>, Tae-Hun Kim<sup>a</sup>, Jun-Hee Park<sup>a</sup>, Soonil Kwon<sup>a</sup>, Min-Jung Kang<sup>b</sup> and Jae-Chul Pyun<sup>a,\*</sup>

<sup>a</sup>Department of Materials Science and Engineering, Yonsei University, 50 Yonsei-Ro, Seodaemun-gu, Seoul 03722, Korea

<sup>b</sup>Korea Institute of Science and Technology (KIST), Seoul 02792, Korea

**Supplementary Fig. S1.** SDS-PAGE of antibodies through stepwise filtration for each target strain of *E. coli* O157:H7, *S. typhimurium*, *L. monocytogenes*, *S. aureus*, and *B. cereus*.

(a)

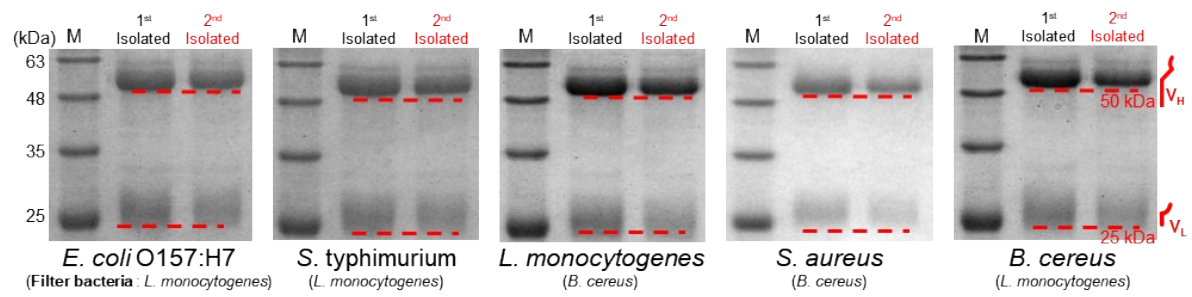

**Supplementary Table S1.** Binding properties of the antibodies against bacteria isolated from horse serum. The binding activity of the isolated antibodies to each strain was indexed by calculating the proportion of the binding activity to the target bacteria as 100 %. In this work, "+++++" represented the binding activity to the target bacteria, and each "+" represented a difference of 20 % from the activity of the target bacteria (100%).

("+",20% of the signal from the target bacteria)

| Target bacteria<br>(Filter bacteria)                         |                          | Normalized binding affinity<br>("+",20% of the signal from the target bacteria) |                       |                         |                  |                  |
|--------------------------------------------------------------|--------------------------|---------------------------------------------------------------------------------|-----------------------|-------------------------|------------------|------------------|
|                                                              |                          | <i>E.coli</i> O157:H7                                                           | <i>S. typhimurium</i> | <i>L. monocytogenes</i> | <i>S. aureus</i> | <i>B. cereus</i> |
| <b><i>E. coli</i> O157:H7</b><br>( <i>L. monocytogenes</i> ) | 1 <sup>st</sup> isolated | +++++                                                                           | -                     | ++++                    | +++              | -                |
|                                                              | 2 <sup>nd</sup> isolated | +++++                                                                           | -                     | -                       | -                | -                |
| <b><i>S. typhimurium</i></b><br>( <i>L. monocytogenes</i> )  | 1 <sup>st</sup> isolated | -                                                                               | +++++                 | ++++                    | +                | -                |
|                                                              | 2 <sup>nd</sup> isolated | -                                                                               | +++++                 | -                       | -                | -                |
| <b><i>L. monocytogenes</i></b><br>( <i>B. cereus</i> )       | 1 <sup>st</sup> isolated | -                                                                               | -                     | +++++                   | -                | +                |
|                                                              | 2 <sup>nd</sup> isolated | -                                                                               | -                     | +++++                   | -                | -                |
| <b><i>S. aureus</i></b><br>( <i>B. cereus</i> )              | 1 <sup>st</sup> isolated | -                                                                               | -                     | -                       | +++++            | ++++             |
|                                                              | 2 <sup>nd</sup> isolated | -                                                                               | -                     | -                       | +++++            | -                |
| <b><i>B. cereus</i></b><br>( <i>L. monocytogenes</i> )       | 1 <sup>st</sup> isolated | -                                                                               | -                     | +++                     | +                | +++++            |
|                                                              | 2 <sup>nd</sup> isolated | -                                                                               | -                     | -                       | -                | +++++            |

**Supplementary Fig. S2.** Analysis of cross reactivity of antibodies isolated by stepwise filtration. Flow cytometric analysis of cross reactivity for the isolated antibodies (1<sup>st</sup> and 2<sup>nd</sup>-filtered antibodies) against other strains. (a) *S. typhimurium*, (b) *L. monocytogenes*, (c) *S. aureus* and (d) *B. cereus*.

(a)

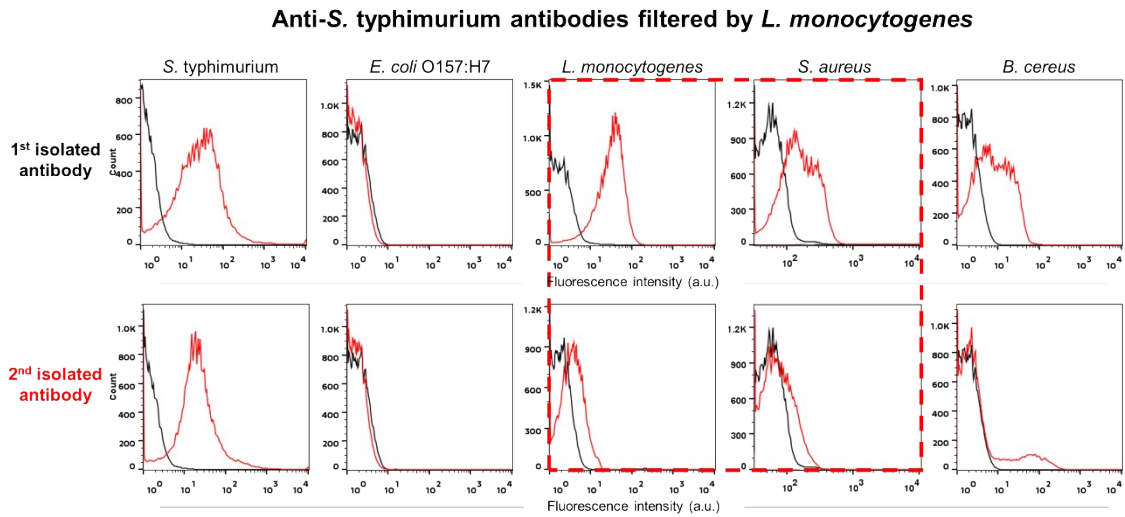

(b)

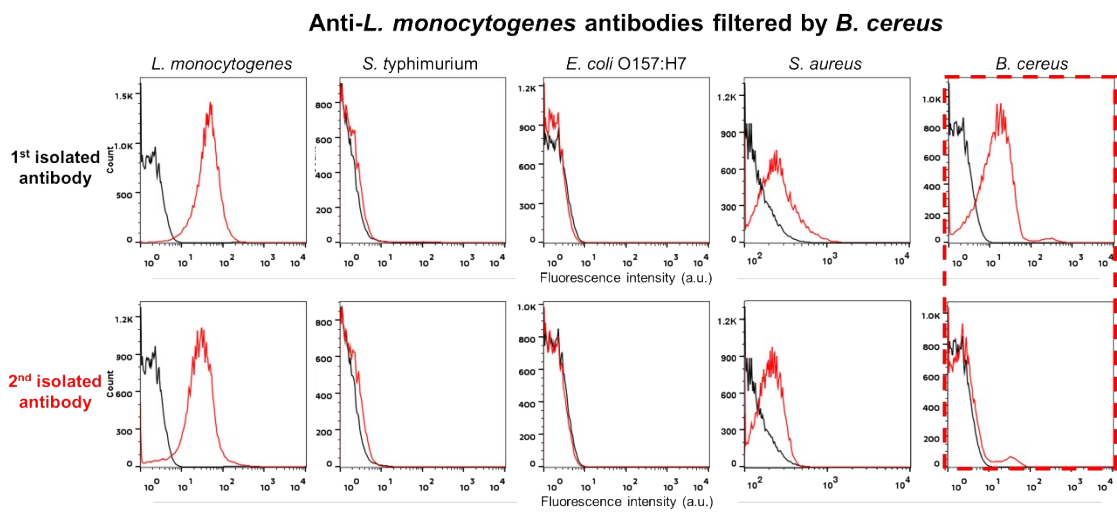

(c)

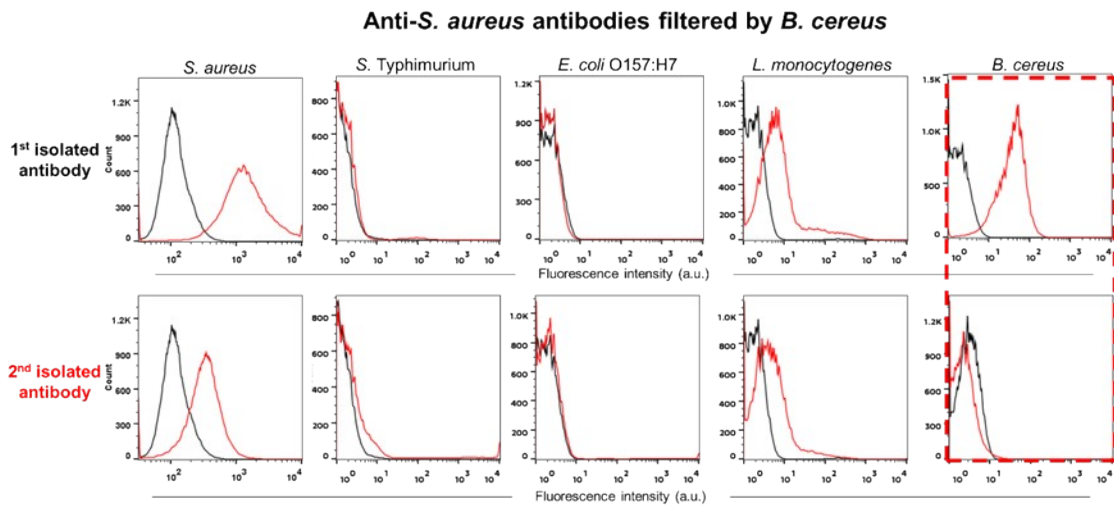

(d)

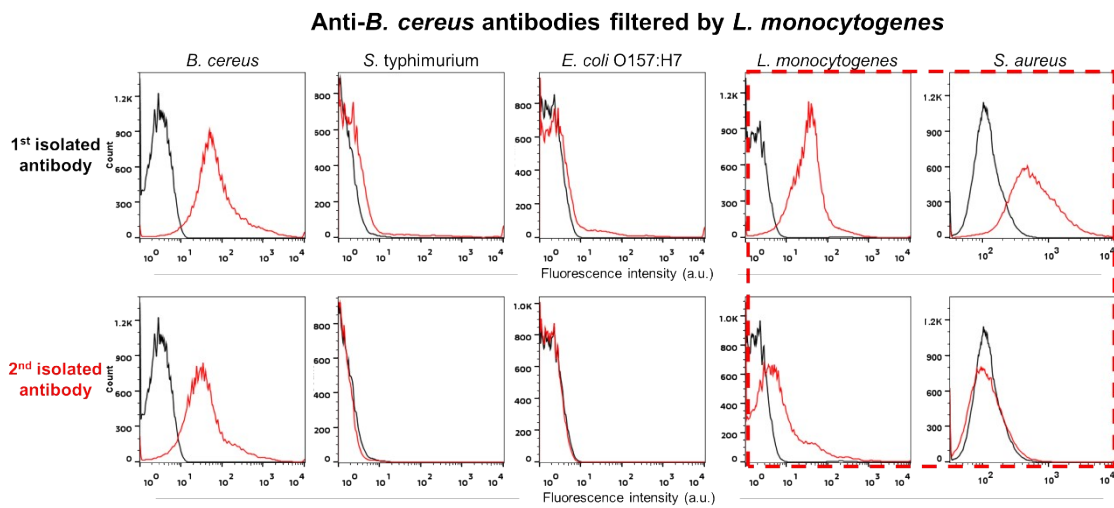

**Supplementary Fig. S3.** Estimation of binding constant ( $K_D$ ) of the isolated antibodies against *E. coli* O157:H7. (a) Schematic view of SPR measurement. The SPR sensor graph and the Hill's plot from the treatment of (b) the 1<sup>st</sup> antibodies and 2<sup>nd</sup> antibodies. Analysis results for other strains were (c) *S. typhimurium*, (d) *L. monocytogenes*, (e) *S. aureus*, and (f) *B. cereus*.

(a)

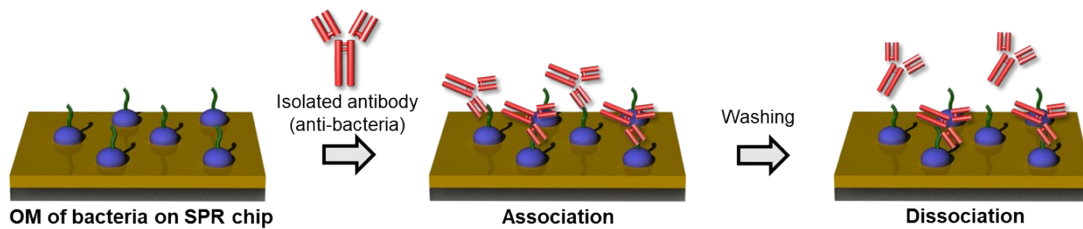

(b) Estimation of binding constant ( $K_D$ ) of the isolated antibodies against *E. coli* O157:H7

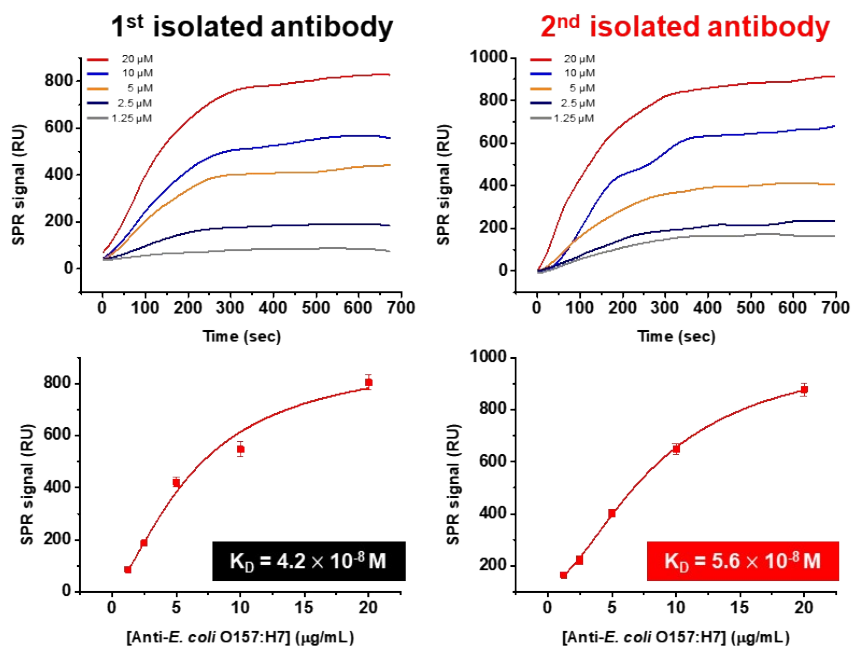

(c) Estimation of binding constant ( $K_D$ ) of the isolated antibodies against *S. typhimurium*.

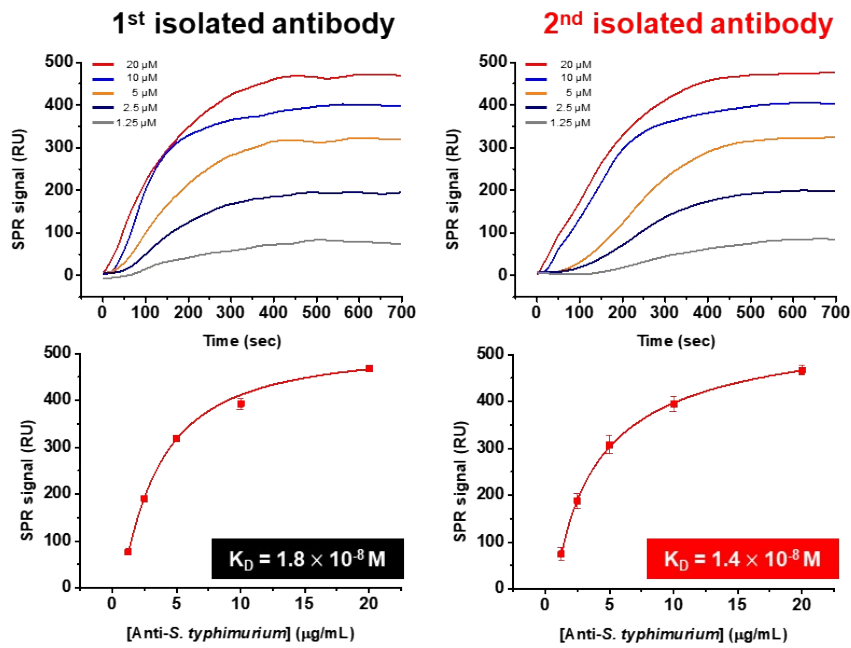

(d) Estimation of binding constant ( $K_D$ ) of the isolated antibodies against *L. monocytogenes*.

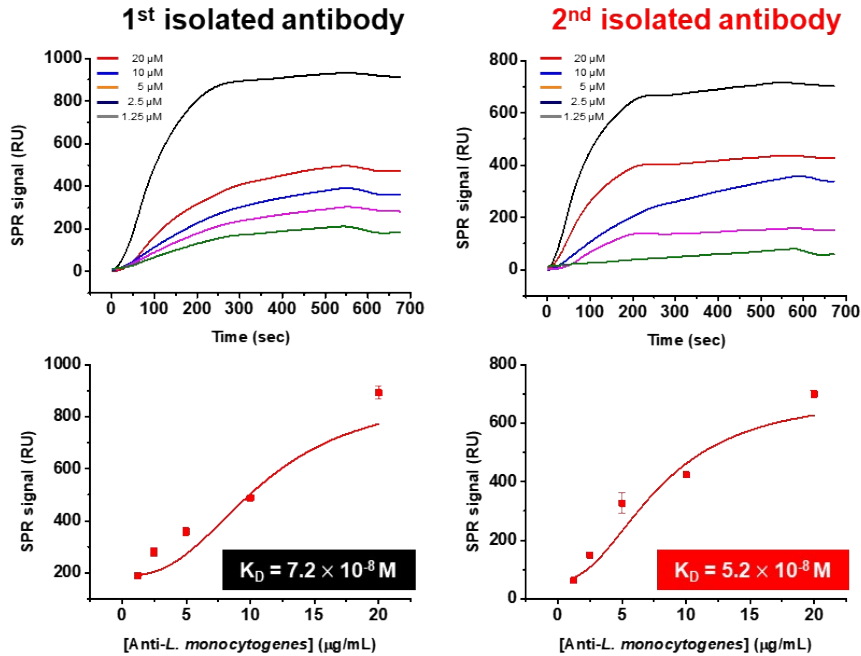

(e) Estimation of binding constant ( $K_D$ ) of the isolated antibodies against *S. aureus*.

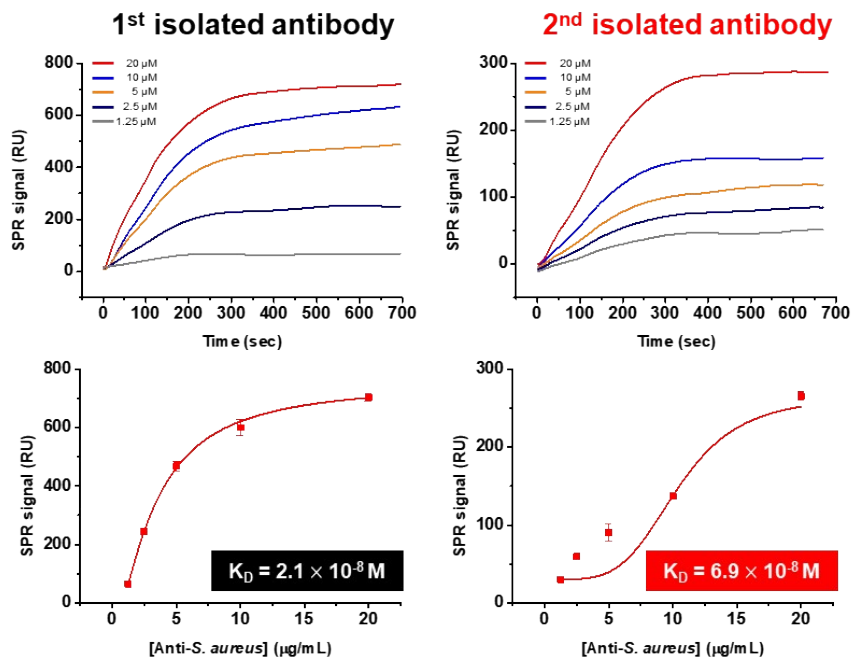

(f) Estimation of binding constant ( $K_D$ ) of the isolated antibodies against *B. cereus*.

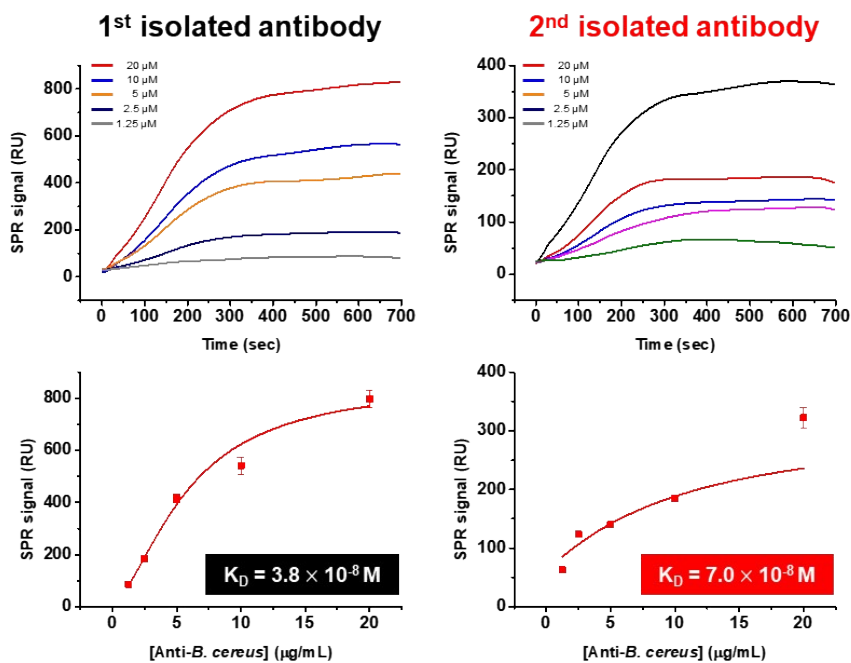



Supplement Fig. S4. Estimation of quenching effect of labeled organic quencher. (a) Fluorescence spectra for the switching peptide bound antibodies with and without organic quencher. The spectrum was measured at the excitation wavelength of 470 nm and emission wavelength range of 500-530 nm. (b) Comparison of fluorescence signal from switching peptide, switching peptide bound antibodies without and with organic quencher (2<sup>nd</sup> and 3<sup>rd</sup> signal) and immobilized antibodies bound with switching peptide.

(a)

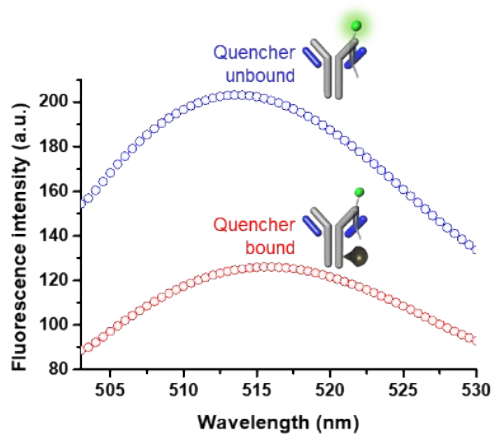

(b)

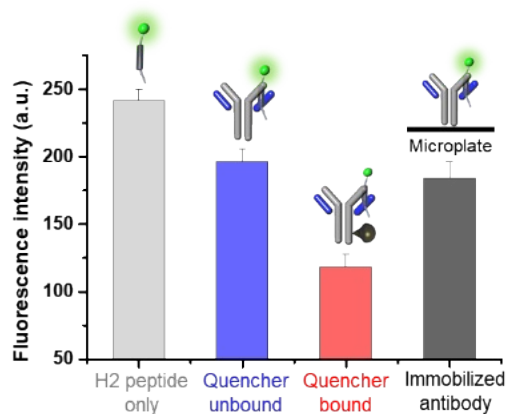

Supplement: d2an00940d1.pdf [file d2an00940d1.pdf]
